# Supplementary material for: Phenotypic drug profiling in droplet microfluidics for better targeting of drug-resistant tumors
Source: Royal Society of Chemistry journal article supplement (doi:10.1039/c5lc00923e), 2015-01-01
Supplement: c5lc00923e1.pdf [file c5lc00923e1.pdf]

## Supplementary Figures

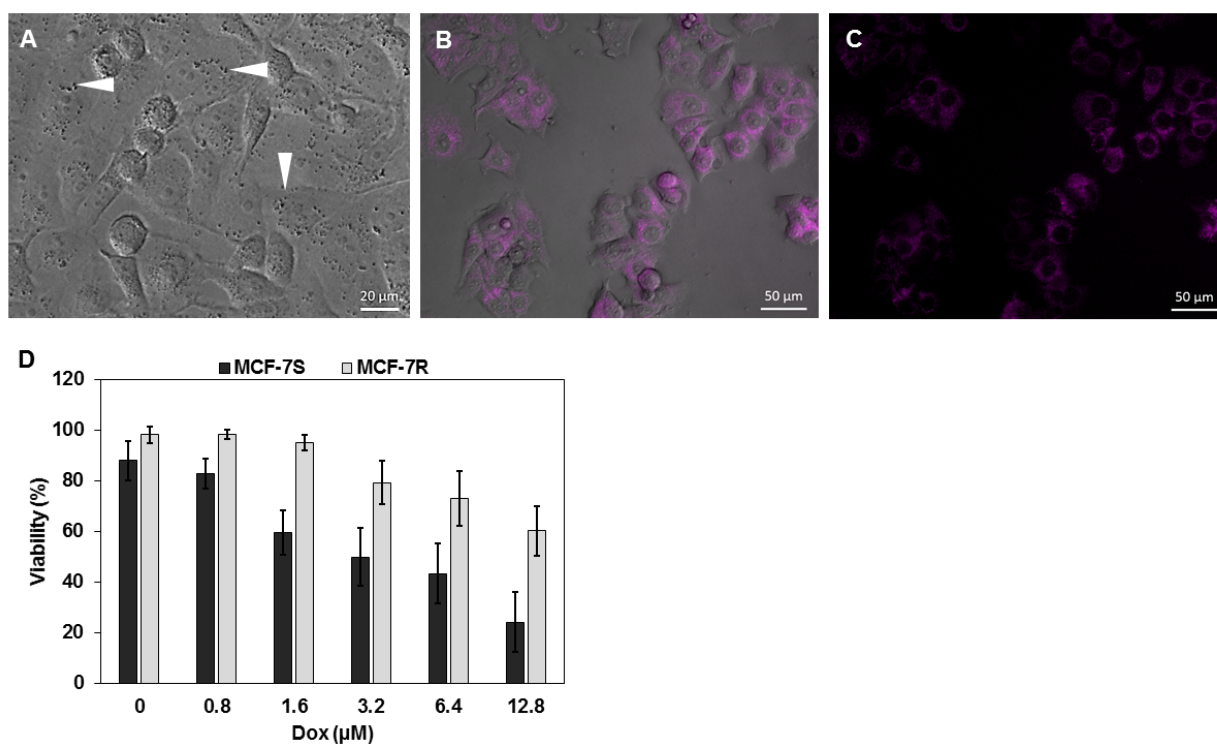

Fig. S1. Morphological differences between MCF-7R and MCF-7S cells. (A) MCF-7R cells depicting large number of vesicles (indicated by arrowheads). Scale bar: 20 $\mu\text{m}$ . (B-C) ABCB1 mRNA detection in adherent MCF-7S cells. These cells do not show prominent vesiculation. Scale bar: 20 $\mu\text{m}$ . (D) Quantitative analysis of MCF-7S and MCF-7R cells in 2D monolayer cultures in the presence of Dox. Live/Dead cells were detected by labeling cells with Calcein AM and Ethidium Homodimer following 48 hours of Dox incubation.

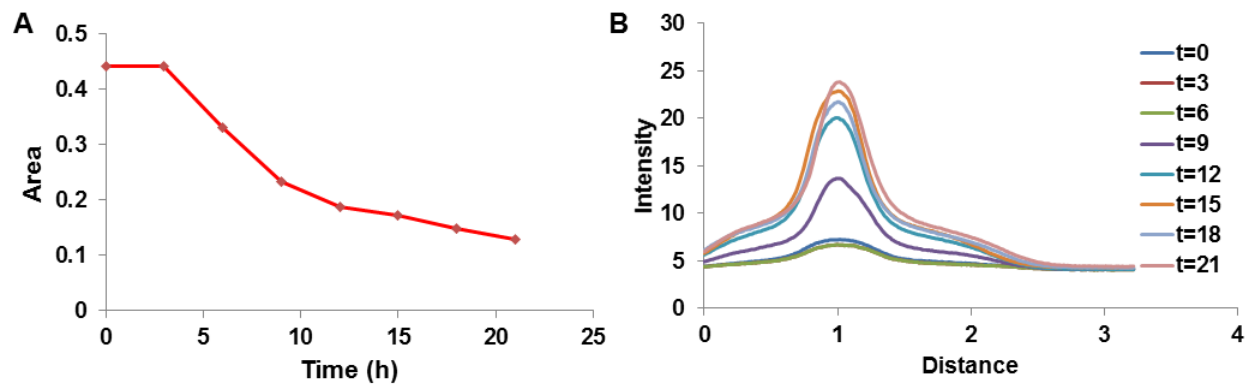

Fig. S2. Potential indication of chromosome condensation in MCF-7R cells in droplets. (A) Representative profile of decrease in nuclear area in a MCF-7R cell. The nuclei were labeled with Hoechst. (B) Change in corresponding intensity over time (in hours).
